# Supplementary material
Source: MDPI journal article supplement (https://www.mdpi.com/2075-4701/11/11/1749)
Supplement: s1 [file s1 › metals-1421958-supplementary.pdf]

# Neutron Diffraction Study of the Martensitic Transformation of $\text{Ni}_{2.07}\text{Mn}_{0.93}\text{Ga}$ Heusler Alloy

Lara Righi <sup>1,2</sup>

<sup>1</sup> Department of Chemistry, Life Sciences and Environmental Sustainability, University of Parma, Parco Area delle Scienze 17/A, 43124 Parma, Italy

<sup>2</sup> IMEM-CNR, Parco Area delle Scienze 37/A, 43124 Parma, Italy

## 1. Crystal Data from Structural Refinement for Austenite and Modulated Martensite for $\text{Ni}_{2.07}\text{Mn}_{0.93}\text{Ga}$ Compound

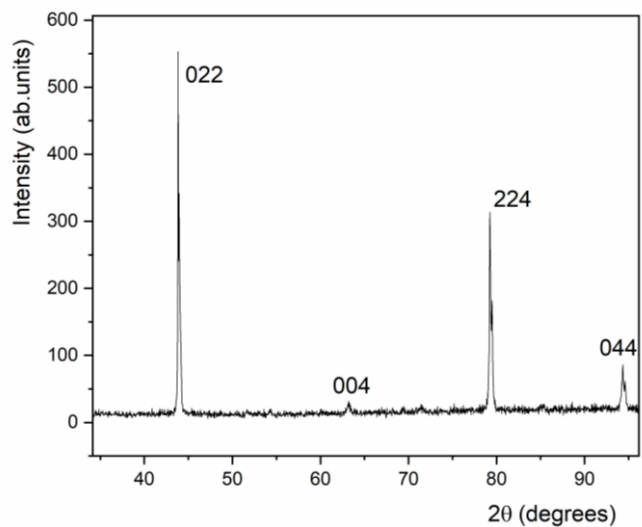

**Figure S1.** X-ray diffraction pattern of the polycrystalline alloy  $\text{Ni}_{2.07}\text{Mn}_{0.93}\text{Ga}$  indicating the presence of cubic austenite as single phase.

**Table S1.** Crystal data of austenitic phase based on the structural refinement of the neutron diffraction data collected at 350 K (above  $T_c$ )

| Composition                 |  | $\text{Ni}_{2.07}\text{Mn}_{0.93}\text{Ga}$ |
|-----------------------------|--|---------------------------------------------|
| Space Group                 |  | F m -3 m                                    |
| System                      |  | Cubic                                       |
| Z                           |  | 4                                           |
| $a$ (Å)                     |  | 5.8319(4)                                   |
| $\alpha \beta \gamma$ (°)   |  | 90 90 90                                    |
| Density (g/Å <sup>3</sup> ) |  | 0.90                                        |
| Source                      |  | Neutrons ( $\lambda = 1.594\text{Å}$ )      |
| $R_p, R_{wp}$ (%)           |  | 5.56, 7.64                                  |

**Table S2.** Atomic coordinated, occupancy factors and thermal parameters for the cubic austenite at 350K.

|     | Wck position | X    | y    | z    | Occupancy factor | Uiso     |
|-----|--------------|------|------|------|------------------|----------|
| Ni1 | 8c           | 0.25 | 0.25 | 0.25 | 1.0              | 0.023(2) |
| Mn1 | 2a           | 0    | 0    | 0    | 0.93(5)          | 0.033(4) |
| Ni2 | 2a           | 0    | 0    | 0    | 0.07(5)          | 0.033(4) |
| Ga1 | 2b           | 0.5  | 0    | 0    | 1.0              | 0.015(2) |

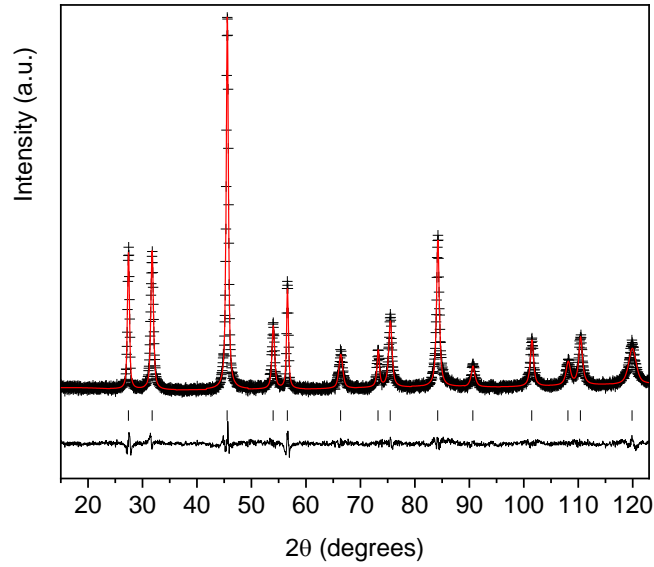

**Figure S2.** Rietveld plot based on neutron diffraction data for the austenitic phase at 350K.

## 2. Modulated Martensite at 200K

**Table S3.** Crystal data of the modulated martensitic phase based on the structural refinement of the neutron diffraction data collected at 220K.

| Composition                          | Ni <sub>2.07</sub> Mn <sub>0.93</sub> Ga |
|--------------------------------------|------------------------------------------|
| Superspace Group                     | Immm(00γ)s00                             |
| System                               | Othorhombic                              |
| Z                                    | 2                                        |
| a (Å)                                | 4.2171(3)                                |
| b (Å)                                | 5.5487(5)                                |
| c (Å)                                | 4.1869(2)                                |
| α β γ (°)                            | 90 90 90                                 |
| V(Å <sup>3</sup> )                   |                                          |
| q                                    | 0.4226(3)c*                              |
| Density (g/Å <sup>3</sup> )          | 0.90                                     |
| source                               | Neutrons (λ = 1.594Å)                    |
| R <sub>p</sub> , R <sub>wp</sub> (%) | 6.45 9.23                                |

**Table S4.** Atomic coordinate, occupancy factors, thermal parameters and modulation parameters A1x for the martensite at 220K.

| Wck position | X        | y    | z | Occupancy factor | Uiso   |
|--------------|----------|------|---|------------------|--------|
| Ni1          | 0.50     | 0.25 | 0 | 1.0              | 0.0234 |
| A1x          | 0.059(3) | 0    | 0 |                  |        |
| Mn1          | 0        | 0    | 0 | 0.93(5)          | 0.0430 |
| Ni2          | 0        | 0    | 0 | 0.07(5)          | 0.0430 |
| A1x          | 0.067(1) |      |   |                  |        |
| Ga1          | 0        | 0.5  | 0 | 1.0              | 0.0154 |
| A1x          | 0.068(5) |      |   |                  |        |

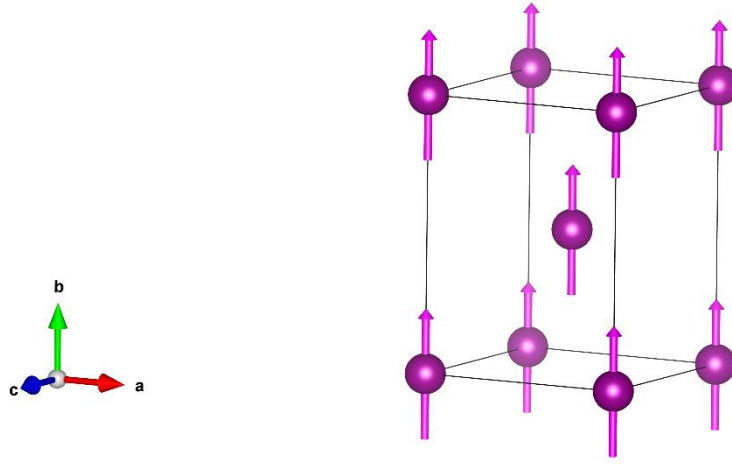

**Figure S3.** Ferromagnetic orientation of the spins located on the Mn/Ni site of the orthorhombic body centered lattice. The magnetic moment refined on the basis of the neutron diffraction pattern collected at 220K corresponds to 2.86  $\mu_B$

### 3. Superspace Approach and Related Parameters

Each satellite of the diffraction pattern is associated to four indexes corresponding to the three basic vector  $a^*$ ,  $b^*$ ,  $c^*$  and to the modulation vector  $q = \alpha a^* + \beta b^* + \gamma c^*$ . If the value of  $\alpha$ ,  $\beta$ , and  $\gamma$  coefficients is a rational number then the modulation is defined commensurate, otherwise, an irrational number determines an incommensurate modulation. The commensurate modulation can always expressed in terms of a three-dimensional superstructure. In order to provide a crystallographic description of an incommensurate structure it is constructed a (3+1)-dimensional virtual space wherein a fourth dimension associated to the modulation vector is added to the classical 3D crystal model.

In the incommensurate modulated crystal the generic atomic position is described as [1]:

$$xi = Xi + ui(x4), \quad (1)$$

$$yi = Yi + ui(x4), \quad (2)$$

$$zi = Zi + ui(x4), \quad (3)$$

where  $X$ ,  $Y$  and  $Z$  are the fractional coordinate in the basic undistorted structure (see Fig1 b). Accordingly to incommensurate periodicity of the modulated structure, the function  $ui(x4)$  added to the generic position defines the periodic displacement from the basic position of a specific atom. The position of a single atom in the incommensurate structure can be defined by the  $t$  parameter. The relationship between  $x4$  and  $t$  is:

$$t = x4 - q \cdot xi \quad (4)$$

The  $t$  parameter can be used, instead of  $x4$ , for describing the atomic position in the (3+1)-dimensional superspace. The  $t$  coordinate corresponds to the fractional coordinates in the conventional 3D symmetry. Generally, the graphical output of the modulation function is reported as a function of the  $t$  parameter.

### 4. The Co-Factor Extrapolation

Among the equivalent 9 possible combinations of crystallographic orientation of the interface between austenite and orthorhombic martensite [2] the following matrix is selected.

$$\begin{bmatrix} \frac{\alpha + \beta}{2} & \frac{\beta - \alpha}{2} & 0 \\ \frac{\beta - \alpha}{2} & \frac{\alpha + \beta}{2} & 0 \\ 0 & 0 & \gamma \end{bmatrix} \quad (5)$$

where  $\alpha = \sqrt{2}a_m/a_0$ ,  $\beta = \sqrt{2}b_m/a_0$  and  $\gamma = c_m/a_0$  ( $a_m$ ,  $b_m$  and  $c_m$  are the unit cell parameters for the martensite and  $a_0$  stands for the unit cell parameter of austenite). The eigenvalue of the matrix so conceived represent the co-factor  $\lambda$ . Having structural data of austenite and martensite for three temperatures (240, 245 and 250K) it is possible to afford the three corresponding co-factors. The values are represented in the Figure 3 c.

## References

- [1] Van Smaalen S.; Incommensurate crystal structures *Crystallography Reviews* **1995**, 4, 79–202
- [2] James, R.D.; K. F. Hane K.F. Martensitic transformations and shape-memory materials. *Acta Mater.* **2000**, 48, 197–222.
